# Supplementary material for: Co-Occurrence and Combinatory Effects of Alternaria Mycotoxins and Other Xenobiotics of Food Origin: Current Scenario and Future Perspectives
Source: Toxins (Basel). 2019 Nov 3;11(11):640. doi: 10.3390/toxins11110640 (PMC6891783; doi:10.3390/toxins11110640)
Supplement: Supplementary file 1 [file toxins-11-00640-s001.xlsx]

## Sheet: Supplementary Table S1
Co-Occurrence and Combinatory Effects of Alternaria Mycotoxins and other Xenobiotics of Food Origin: Current Scenario and Future Perspectives; Francesco Crudo, Elisabeth Varga, Georg Aichinger, Gianni Galaverna, Doris Marko, Chiara Dall’Asta and Luca Dellafiora
Supplementary Table S1 Co-occurrence of Alternaria toxins in food
Food/Foodstuff	Number of samples	Alternaria mycotoxins													Method details			Reference
		AOH		AME		ALT		TeA		TEN		ATX-I		Other
		Frequency		Frequency		Frequency		Frequency		Frequency		Frequency
Fruits, vegetables and derivatives
Apple	8	0.875	X (mean 7.8, < 0.1 - 58.8 mg/kg)	1	X (mean 1.0, < 0.1 - 2.3 mg/kg)	0.625	X (mean 0.1, < 0.1 - 0.5 mg/kg)	1	X (mean 0.2, < 0.1 - 0.5 mg/kg)			0.625	X		HPLC-DAD and TLC (ATX-I)	324 nm (dibenzopyrones), 278 nm (TeA) and 364 nm (ATX-I)		[19]
Apple juice	4	0.75	X (mean 0.17; 0.16-0.22 µg/kg)	0.75	X (detected, but < LOQ)										HPLC-MS/MS using stable isotope dilution assays (SIDAs)	ESI (-)	API 4000 QTrap (Applied Biosystems INC, Foster City, CA, USA)	[36]
Apple juice	11	1	X (traces (0.4) to 2.4 ng/mL)	1	X (traces (0.03 to 0.43 ng/mL)										HPLC-UV and HPLC-MS/MS	ESI (-)	Micromass Quattro II (Micromass, Manchester, UK)	[43]
Apple juice	10		-		–	0.1	X (45.6 ng/g)	0.2	X (24.3-45.3 ng/g)		–				HPLC-MS	APCI	MS-310 QqQ (Varian)	[40]
Apple juice (concentrated)	32	ca. 50%	X (1.35-5.42 ng/mL)	ca. 50%	X (traces to 1.71 ng/mL)										HPLC-UV			[44]
Apples (fresh)	11	0.0909091	(X, < 2.0 - 29 µg/kg)		(-, < 1.0 µg/kg)		(-, < 1.5 µg/kg)		(-, < 5 µg/kg)		(-, < 2.5 µg/kg)				UHPLC-MS/MS	ESI (-)	QTrap 5500, (AB Sciex)	[41]
Apples juices	7		(-, < 2.0 µg/kg)		(-, < 1.0 µg/kg)		(-, < 1.5 µg/kg)		(-, < 5 µg/kg)		(-, < 2.5 µg/kg)				UHPLC-MS/MS	ESI (-)	QTrap 5500, (AB Sciex)	[41]
Berry juice	32	0.34	X (mean 18.7; 2.5-85.1 ng/mL)	0.31	X (mean 160.5; 266.7-308.3 ng/mL)						< 0.4 ng/mL				HPLC-QTrap	ESI (+)	3200 QTrap AB Sciex (Applied Biosystems, Foster City, CA)	[37]
Citrus juice	86		–	0.0465116	X (max 0.2 µg/kg)			0.1	X (mean 1.28, 1.21 - 4.3 µg/kg)		–				UHPLC-MS/MS	ESI (-)	Quattro Premier XE (Waters Micromass, Manchester, UK)	[38]
Cranberry juice	5	0.2	X (0.04 µg/L)	0.2	X (0.003 µg/L)										HPLC-MS/MS	ESI (-)	Quattro Ultima (Micromass)	[39]
Dried apricots	56		-	0.0535714	X (mean 1.3, 0.5 - 2.1 µg/kg)			0.375	X (mean 237.1, 10.4 - 1232 µg/kg)	0.0714286	X (mean 14.0, 2.7 - 28.0 µg/kg)				UHPLC-MS/MS	ESI (-)	TQ-S (Waters Micromass, Manchester, UK)	[58]
Dried dates	53		-					0.339623	X (mean 873.2, 9.6 - 4411 µg/kg)	0.132075	X (mean 6.2, 1.4 - 11.2 µg/kg)				UHPLC-MS/MS	ESI (-)	TQ-S (Waters Micromass, Manchester, UK)	[58]
Dried figs	5		(-, < 2.0 µg/kg)		(-, < 1.0 µg/kg)		(-, < 1.5 µg/kg)	1	(X, mean 1043, 25 - 2345 µg/kg)		(-, < 2.5 µg/kg)				UHPLC-MS/MS	ESI (-)	QTrap 5500, (AB Sciex)	[41]
Dried figs	20	0.2	X (0.89 - 10.87 µg/kg)	0.7	X (2.94 - 30.06 µg/kg)						–				UHPLC-MS/MS	ESI (-)	Xevo TQ (Waters, USA)	[57]
Dried grape berries	13	0.846154	X (mean pos: 419, 52 - 1308 µg/kg)	0.923077	X (mean pos: 179, 2 - 4120 µg/kg)	0.538462	X (mean pos: 1480, 18 - 4120 µg/kg)	0.846154	X (mean pos: 10700, 4 - 31200 µg/kg)	0.923077	X (mean pos: 168, 4 - 762 µg/kg)	0.692308	X (mean pos: 51, 8 - 160 µg/kg)	ATX-II (X, frequency 62%, mean pos 20, 2 - 43 µg/kg), MACRO (X, frequency 69%, 163, 1 - 1624 µg/kg)				[35]
Dried jujubes	35	0.0571429	X (10.42 - 17.27 µg/kg)	0.114286	X (0.94 - 11.47 µg/kg)					0.114286	X (1.19 - 2.38 µg/kg)				UHPLC-MS/MS	ESI (-)	Xevo TQ (Waters, USA)	[57]
Dried longan			-		-						-				UHPLC-MS/MS	ESI (-)	Xevo TQ (Waters, USA)	[57]
Dried noodle	52	0.06	X (mean 10.7, 9.59 - 11.8 µg/kg)	0.61	X (mean 1.17, 0.18 - 4.10 µg/kg)			0.96	X (mean 47.6, 4.86 - 158 µg/kg)	0.88	X (mean 13.9, 2.25 - 32 3 µg/kg)				UHPLC-MS/MS	ESI (-)	Quattro Premier XE (Waters Micromass, Manchester, UK)	[53]
Dried persimmons	20	0.1	X (7.06 - 90.94 µg/kg)	0.1	X (0.53 - 9.34 µg/kg)						–				UHPLC-MS/MS	ESI (-)	Xevo TQ (Waters, USA)	[57]
Dried raisins	30	0.0666667	X (7.96 - 11.20 µg/kg)	0.0333333	X (2.43 µg/kg)						–				UHPLC-MS/MS	ESI (-)	Xevo TQ (Waters, USA)	[57]
Dried raisins	57	0.0526316	X (mean 8.9, 3.5 - 15.6 µg/kg)	0.192982	X (mean 3.1, 0.3 - 13.5 µg/kg)		–	0.350877	X (mean 104.8, 6.9 -594 µg/kg)		-				UHPLC-MS/MS	ESI (-)	TQ-S (Waters Micromass, Manchester, UK)	[58]
Dried wolfberries	54	0.037037	X (mean 16.6, 5.9 - 27.4 µg/kg)	0.0740741	X (mean 3.9, 0.2 - 15.0 µg/kg)		–	0.203704	X (mean 3.9, 0.2 - 15.0 µg/kg)	0.62963	X (mean 16.6, 5.9 - 27.4 µg/kg)				UHPLC-MS/MS	ESI (-)	TQ-S (Waters Micromass, Manchester, UK)	[58]
Fresh citrus	11														UHPLC-MS/MS	ESI (-)	QTrap 5500, (AB Sciex)	[41]
Fruit punch	1	1	X (0.27 µg/kg)	1	X (0.04 µg/kg)										HPLC-MS/MS using stable isotope dilution assays (SIDAs)	ESI (-)	API 4000 QTrap (Applied Biosystems INC, Foster City, CA, USA)	[36]
Grape juice	5	1	X (mean 0.11, 0.10-1.05 µg/kg)	0.4	X (detected, but < LOQ)										HPLC-MS/MS using stable isotope dilution assays (SIDAs)	ESI (-)	API 4000 QTrap (Applied Biosystems INC, Foster City, CA, USA)	[36]
Grape juice	14	0.214286	X (mean pos: 0.23, 0.03 - 0.46 µg/L)	0.285714	(mean pos: 9.9, 0.01 - 39.5 µg/L)										HPLC-MS/MS	ESI (-)	Quattro Ultima (Micromass)	[39]
Ketchup	19	0.157895	X (4 - 5 µg/kg)	0.157895	X (1 µg/kg)		-	1	X (mean 37, 3 - 141 µg/kg)		-				UHPLC-MS/MS	ESI (-)	Xevo (Waters, Baden-Dättwil, Szitzerland)	[52]
Ketchup	31		X	14 (45%) 28 (90%)	X (mean 80, 2.5-300 µg/kg) X (mean 8.0, 0.32-38 µg/kg)				X (mean 338, 10.2 - 1787 µg/kg)	0.84	X (max 15.8 µg/kg)				UHPLC-MS/MS	ESI (-)	Quattro Premier XE (Waters Micromass, Manchester, UK)	[38]
Lemmons (inoculated with Alternaria citrii)	6	0.833333	X (mean 1.1, < 0.1 - 2.8 mg/kg)	1	X (mean 1.1, < 0.1 - 4.4 mg/kg)	1	X (mean 0.1, < 0.1 - 0.5 mg/kg)	1	X (mean 16.1, < 0.6 - 48.8 mg/kg)			1	X		HPLC-DAD and TLC (ATX-I)	324 nm (dibenzopyrones), 278 nm (TeA) and 364 nm (ATX-I)		[19]
Mixed juice (fruits and vegetables)	23	0.565217	X (mean pos 3.1, < LOQ - 16 µg/kg)	0.434783	X (mean pos 1.8, < LOQ - 4.9 µg/kg)	0.04	X (< LOQ)	0.521739	X (mean pos 73, < LOQ - 250 µg/kg)	0.478261	X (mean pos 1.0, < LOQ - 1.0 µg/kg)		–	IsoALT (–), AAL TA1 (–), AAL TA2(–)	HPLC-MS/MS	ESI (-)	QTrap 5500 (AB Sciex, Darmstadt, Germany)	[46]
Olives	10		(-, < 2.0 µg/kg)		(-, < 1.0 µg/kg)		(-, < 1.5 µg/kg)	0.1	(X, < 5 - 5.3 µg/kg)		(-, < 2.5 µg/kg)				UHPLC-MS/MS	ESI (-)	QTrap 5500, (AB Sciex)	[41]
Orange juice	2	1	X (mean 0.20, 0.16-0.24 µg/kg)	1	X (mean 0.23, 0.18-0.27 µg/kg)										HPLC-MS/MS using stable isotope dilution assays (SIDAs)	ESI (-)	API 4000 QTrap (Applied Biosystems INC, Foster City, CA, USA)	[36]
Oranges (inoculated with Alternaria citrii)	6	1	X (mean 11.5, < 0.1 - 41.0 mg/kg)	1	X (mean 13.1, < 0.4 - 33.3 mg/kg)	1	X (mean 4.1, < 0.1 - 15.9 mg/kg)	1	X (mean 26.6, < 0.1 - 61.1 mg/kg)			1	X		HPLC-DAD and TLC (ATX-I)	324 nm (dibenzopyrones), 278 nm (TeA) and 364 nm (ATX-I)		[19]
Purree infant food (vegetable and fruit based)	6	0.67	X (mean 9.62, < 0.4 - 54.2 µg/kg)	0.833333	X (mean 1.53, 0.04 - 7.56 µg/kg)			0.666667	X (mean 86.5, < 5.4 - 505 µg/kg)	0.33	X (mean 0.23, 0.44 - 0.93 µg/kg)		–	ALP (–)	HPLC-MS/MS	ESI (-)	LCMS-8050 (Shimadzu Corporation, Kyoto, Japan)	[21]
Raspberry juice, cranberry juice and nectar, black currant juice, grape juice, red wine, peach, prune nectar	9	0.55	X (ND (< 0.31-0.74) to 5.6 ng/mL)	0.33	X (ND (< 0.08-0.47) to 0.7 ng/mL)										HPLC-UV and HPLC-MS/MS	ESI (-)	Micromass Quattro II (Micromass, Manchester, UK)	[43]
Strawberry (one out of several storage conditions)	21	0.33	X (0. 13 - 0.724 µg/kg)	0.52	X (0.010 - 0.026 µg/kg)			0.66	X (0.010 - 0.724 µg/kg)						HPLC-QTrap	ESI (+)	3200 QTrap AB Sciex (Applied Biosystems, Foster City, CA)	[49]
Sweet pepper	48	0.32	X (mean 29, 3-98 µg/kg)	0.29	X (mean 56, 7-262 µg/kg)			0.5	X (mean1344, 8-11400 µg/kg)					database of 378 known and putative compounds from Alternaria, Lewia and other related genera, tentative identification based on accurate mass and isotopic pattern	UHPLC-DAD-HRMS	ESI (+) and ESI (-)	MaXis 3 G QTOF mass spectrometer (Bruker Daltonics, Bremen, Germany)	[47]
Sweet pepper (dried)	23	0.43	X (mean 78, < 0.99 - 428 µg/kg)	0.17	X (mean 10.7, < 0.16 - 20.2 µg/kg)		- (< 2.3 µg/kg)	1	X (mean 914, 4.4 - 8248 µg/kg)						HPLC-MS/MS	ESI (-)	API 5000 system (Applied Biosystems, Foster City, CA, USA)	[29]
Sweet pepper (fresh)	7	0.86	X (mean 111, < 0.99 - 270 µg/kg)	0.57	X (mean 10.0, < 0.16 - 17.8 µg/kg)	0.43	X (mean 68.8, < 2.3 - 139.9 µg/kg)	1	X (mean 27032, < 1.24 - 67828 µg/kg)						HPLC-MS/MS	ESI (-)	API 5000 system (Applied Biosystems, Foster City, CA, USA)	[29]
Sweet pepper (fried)	7	0.14	X (mean 1.6, < 0.99 - 1.6 µg/kg)	1	X (mean 2.0, < 0.16 - 2.0 µg/kg)		- (< 2.3 µg/kg)	1	X (mean 225, 4.3 - 13120 µg/kg)						HPLC-MS/MS	ESI (-)	API 5000 system (Applied Biosystems, Foster City, CA, USA)	[29]
Sweet pepper (grounded)	8	1	X (mean 176, 1.6 - 1110 µg/kg)	0.75	X (mean 18.3, < 0.16 - 36.7 µg/kg)	0.13	X (mean 40.3, < 2.3 -40.3 µg/kg)	1	X (mean 623, 208 - 1989 µg/kg)						HPLC-MS/MS	ESI (-)	API 5000 system (Applied Biosystems, Foster City, CA, USA)	[29]
Tangerine (flavedo, no detection in albedo)	8	0.75	X (mean pos 10.6, 2.5 - 17.4 µg/kg)	0.75	X (mean pos 2.7, 0.9 - 3.5 µg/kg)										HPLC - MS/MS	ESI (-)	Quattro Premier T-Wave mass spectrometer (Waters, Manchester, UK)	[50]
Tomato			Xa (0.1-0.9 µg/g)		Xa (0.3-0.8 µg/g)				Xa (0.1-1 µg/g)				–	ATX-II (–)	TLC			[51]
Tomato	19	0.315789	X (mean 0.3, < 0.1 - 5.3 mg/kg)	0.263158	X (mean 0.1, < 0.1 - 0.8 mg/kg)	0.210526	X (mean 0.1, < 0.1 - 1.1 mg/kg)	0.578947	X (mean 17.6, < 0.1 - 139 mg/kg)				–		HPLC-DAD and TLC (ATX-I)	324 nm (dibenzopyrones), 278 nm (TeA) and 364 nm (ATX-I)		[19]
Tomato (peeled, minced)	13	1	X (4 - 7 µg/kg)	0.0769231	X (1 µg/kg)		-	1	X (mean 81, 25 - 200 µg/kg)	0.0769231	(2 µg/kg)				UHPLC-MS/MS	ESI (-)	Xevo (Waters, Baden-Dättwil, Szitzerland)	[52]
Tomato (puree, concentrates)	17	0.647059	X (4 - 33 µg/kg)	0.705882	X (1 - 9 µg/kg)		-	1	X (mean 165, 2 - 790 µg/kg)	0.352941	(X, 1 - 3 µg/kg)				UHPLC-MS/MS	ESI (-)	Xevo (Waters, Baden-Dättwil, Szitzerland)	[52]
Tomato (sauces, soup)	24	1	X (4 - 10 µg/kg)	0.291667	X (1 - 4 µg/kg)		-	1	X (mean 40, 4 - 144 µg/kg)		-				UHPLC-MS/MS	ESI (-)	Xevo (Waters, Baden-Dättwil, Szitzerland)	[52]
Tomato juice	2	1	X (mean 1.26, 0.52-1.99 µg/kg)	1	X (mean 0.31, 0.23-0.38 µg/kg)										HPLC-MS/MS using stable isotope dilution assays (SIDAs)	ESI (-)	API 4000 QTrap (Applied Biosystems INC, Foster City, CA, USA)	[36]
Tomato juice	9		–	0.78	X (mean 1.4, max. 5.8 µg/kg)				X (mean 87, 7.4 - 278 µg/kg)	0.33	X (max 5.7 µg/kg)				UHPLC-MS/MS	ESI (-)	Quattro Premier XE (Waters Micromass, Manchester, UK)	[38]
Tomato products	10	0.5	X (4.0-6.8 ng/g)		–	0.8	X (3.8-4.82 ng/g)		–	0.1	X (4.7 ng/g)				HPLC-MS	APCI	MS-310 QqQ (Varian)	[40]
Tomato products (canned, sun-dried, ketchup)	80	0.175	X (mean pos: 0.43, 0.06 - 0.98 mg/kg)	0.075	X (mean pos: 0.07, 0.04 - 0.12 mg/kg)	0.1125	X (mean pos: 7.5, 0.28 - 22.82 mg/kg)								HPLC-DAD, confirmation: HPLC-MS	ESI (-)	ESQUIRE-LC ion trap spectrometer (Bruker Daltonic, Bremen, Germany)	[45]
Tomato products (puree and ketchup)	34	0.705882	X (mean pos 13, < LOQ - 25 µg/kg)	0.794118	X (mean pos 2.5, < LOQ - 7.4 µg/kg)		–	0.911765	X (mean pos 200, < LOQ - 460 µg/kg)	0.264706	Xa (< LOQ)		–	IsoALT (–), AAL TA1 (–), AAL TA2(–)	HPLC-MS/MS	ESI (-)	QTrap 5500 (AB Sciex, Darmstadt, Germany)	[46]
Tomato sauce	56	0.3	X (mean 6.7, 1.2 - 20.8 µg/kg)	0.55	X (mean 1.4, < 0.1 - 4.7 µg/kg)	0.02	Xa (< 10 µg/kg)	0.71	X (mean 146, < 12 - 691 µg/kg)	0.11	X (mean 0.6, 0.2 - 1.2 µg/kg)	0.23	X (mean 2.2, 0.5- 3.7 µg/kg)	ALP (X, frequency 21%, mean 4.0, < 1.6 - 8 µg/kg), AOH-3-S (X, frequency 9%, mean 1.2, > 2 - 2.1 µg/kg), AME-3-S (X, frequency 34%, mean 2.5, 0.3 - 17.5 µg/kg)	HPLC-MS/MS	ESI (-)	TSQ Vantage (Thermo Scientific)	[20]
Tomato sauces	8	0.5	(X, mean 16, < 2.0 - 25µg/kg)	0.5	(X, mean 3.8, < 1.0 - 7.8 µg/kg)		(-, < 1.5 µg/kg)	1	(X, mean 202, 66 - 462 µg/kg)		(-, < 2.5 µg/kg)				UHPLC-MS/MS	ESI (-)	QTrap 5500, (AB Sciex)	[41]
Tomatoes (dried)	8	0.125	X (4 µg/kg)	0.375	X (2 - 7 µg/kg)	0.25	X (2 µg/kg)	0.875	X (mean 52, < 2 - 166 µg/kg)	0.25	(X 2 µg/kg)				UHPLC-MS/MS	ESI (-)	Xevo (Waters, Baden-Dättwil, Szitzerland)	[52]
Tomatoes (fresh and whole)	4		-				-	0.25	X (mean 9, < 2 - 37 µg/kg)		-				UHPLC-MS/MS	ESI (-)	Xevo (Waters, Baden-Dättwil, Szitzerland)	[52]
Tomatoes (fresh)	19		(-, < 2.0 µg/kg)		(-, < 1.0 µg/kg)		(-, < 1.5 µg/kg)		(-, < 5 µg/kg)		(-, < 2.5 µg/kg)				UHPLC-MS/MS	ESI (-)	QTrap 5500, (AB Sciex)	[41]
Tomatoes (mouldy)	14	0.785714	X (mean pos: 32.5, 24.7 - 73.5 mg/kg)	0.357143	X (mean pos: 0.06, 0.04 - 0.14 mg/kg)	0.142857	X (mean pos: 8.6, 5.4 - 11.8 mg/kg)								HPLC-DAD, confirmation: HPLC-MS	ESI (-)	ESQUIRE-LC ion trap spectrometer (Bruker Daltonic, Bremen, Germany)	[45]
Vegetable juice	1	1	X (7.82 µg/kg)	1	X (0.79 µg/kg)										HPLC-MS/MS using stable isotope dilution assays (SIDAs)	ESI (-)	API 4000 QTrap (Applied Biosystems INC, Foster City, CA, USA)	[36]
Vegetable oils (rapeseed and sunflower seeds)	19	0.473684	X (mean pos 6.0, < LOQ - 6 µg/kg)	0.842105	X (mean pos 9.9, < LOQ - 14 µg/kg)		–		Xa		X		–	IsoALT (–), AAL TA1 (–), AAL TA2(–)	HPLC-MS/MS	ESI (-)	QTrap 5500 (AB Sciex, Darmstadt, Germany)	[46]
Cereals and derivatives
Bakery products (wheat- and rye- based)	9	0.888889	X (< LOQ)	0.888889	X (mean pos 3.2, < LOQ - 3.2 µg/kg)		–	1	X (mean pos 140, < LOQ - 210 µg/kg)	1	X (mean pos 11, < LOQ - 12 µg/kg)		–	IsoALT (–), AAL TA1 (–), AAL TA2(–)	HPLC-MS/MS	ESI (-)	QTrap 5500 (AB Sciex, Darmstadt, Germany)	[46]
Bread	50	0.02	X (9.98 µg/kg)	0.44	X (1.07, 0.18 - 6.49 µg/kg)			0.98	X (mean 11.7, 1.95 - 38.2 µg/kg)	0.82	X (mean 8.37, 3.13 - 27.2 µg/kg)				UHPLC-MS/MS	ESI (-)	Quattro Premier XE (Waters Micromass, Manchester, UK)	[53]
Cereal grains	14	0.0714286	(X, < 2.0 - 5.2 µg/kg)	0.07	(-, < 2.0 - 3.0 µg/kg)		(-, < 1.4 µg/kg)			1	(X, mean 202, 66 - 462 µg/kg)				UHPLC-MS/MS	ESI (-) & ESI (+)	Xevo-TQ-S (Waters, Hertfordshire, UK)	[41]
Corn silage	15	0.533333	X (mean 4, 1.5 - 12 µg/kg)	1	X (mean 1, 0.2 - 11 µg/kg)					1	X (mean 5.5, 1 - 31 µg/kg)			MACRO (X, frequency 100%, mean 25, 4 - 82 µg/kg)	HPLC-MS/MS & LC-UV	ESI (-)	QTrap 4000 Applied Biosystems, Foster City, CA, USA)	[33]
Fonio millet	16	0.81	X (mean 2, 0.3 - 10 µg/kg)	0.94	X (mean 4, 0.3 - 16 µg/kg)			1	X (mean 235, 14 - 1049 µg/kg)					macrosporin (X, frequency 100%, mean 156, 4 - 555 µg/kg)	HPLC- MS/MS	ESI (-)	QTrap 5500 (Applied Biosystems, Foster City, CA)	[59]
Infant formula food (cereal based)	19	0.37	X (mean 0.89, < 1.4 - 7.17 µg/kg)	0.89	X (mean 0.24, < 0.15 - 0.58 µg/kg)			0.95	X (mean 50.2, < 3 - 221 µg/kg)	0.95	X (mean 1.0, < 0.1 - 7.53 µg/kg)	0.16	X (mean 0.17, < 0.9 - 1.52 µg/kg)	ALP (X, frequency 5%, mean 0.24, 4.47 µg/kg)	HPLC-MS/MS	ESI (-)	LCMS-8050 (Shimadzu Corporation, Kyoto, Japan)	[21]
Maize	8	0.25	X (median 5, 4.8 - 5.4 µg/kg)	1	X (median 1, 0.4 - 45 µg/kg)									Macrosporin A (X, frequency 100%, median 4, 0.7 - 9 µg/kg)	HPLC- MS/MS	ESI (-)	QTrap 5500 (Applied Biosystems, Foster City, CA)	[54]
Ragi			–		X (0.8-1.4 mg/kg)		X (0.03 mg/kg)		X (2.03-5.7 mg/kg)				–		TLC			[30]
Sorghum			–		X (0.6 -1.8 mg/kg)		X (0.02 -0.7 mg/kg)		X (1.3 -5.6 mg/kg)				–		TLC			[30]
Steamed bread	40		-	0.72	X (0.64, 0.21 - 1.41 µg/kg)			1	X (mean 21.2, 6.56-46.3 µg/kg)	1	X (mean 10.7, 2.46 - 31 6 µg/kg)				UHPLC-MS/MS	ESI (-)	Quattro Premier XE (Waters Micromass, Manchester, UK)	[53]
Weathered wheat	22	0.91	(X, mean 335, 116 - 731 µg/kg)	0.96	(X, mean 443, 52 - 1426 µg/kg)		-	1	(X, mean 2419, 260 - 6432 µg/kg)				-		UHPLC- UV			[56]
Wheat	63	0.0634921	X (mean 1054, 645 - 1388 ng/mL)	0.238095	X (mean 2118, 566 - 7451 ng/mL)			0.190476	X (mean 2313, 1001-8814 ng/mL)						HPLC-DAD			[55]
Wheat	1064	0.08	X (< 10 to 830 µg/kg)	0.03	X (< 10 to 900 µg/kg)	0.026	X (50 to 197 µg/kg)	0.3	X (< 60 to 4200 µg/kg)						HPLC-DAD & FLD; HPLC-MS/MS for samples since 2010		4000 QTrap (AB Sciex, Darmstadt, Germany)	[31]
Wheat flour	100	0.13	X (mean 3.5, < 1.2 - 13 µg/kg)	0.4	X (mean 1, 0.1 - 3.3 µg/kg)		-	0.31	X (mean 89, < 14 - 330 µg/kg)	0.18	X (mean 1.3, < 1 - 5.5 µg/kg)	0.2	X (mean 2.5, < 1.2 - 5.6 µg/kg)	ALP (X, frequency 36%, mean 12.2, < 2 - 47.9 µg/kg), AOH-3-S (-), AME-3-S (X, frequency 1%, 0.4 µg/kg)	HPLC-MS/MS	ESI (-)	TSQ Vantage (Thermo Scientific)	[20]
Wheat flour	181	0.06	X (mean 30.2, 16 - 98.7 µg/kg)	0.91	X (mean 3.77, 0.32 - 61.8 µg/kg)			0.99	X (mean 88.4, 1.76 - 520 µg/kg)	0.97	X (mean 27.1, 2.72 - 129 µg/kg)				UHPLC-MS/MS	ESI (-)	Quattro Premier XE (Waters Micromass, Manchester, UK)	[53]
Wheat silage	15	0.666667	X (mean 6, 1.5 - 23 µg/kg)	1	X (mean 2, 0.1 - 11 µg/kg)					0.933333	X (mean 2.5, 0.7 - 9 µg/kg)			MACRO (X, frequency 100%, mean 28, 1.5 - 219 µg/kg)	HPLC-MS/MS	ESI (-)	QTrap 4000 Applied Biosystems, Foster City, CA, USA)	[33]
Dried fruits and nuts
Almonds	8	0.125	Xa (< LLOQ)	0.375	X (mean 0.56; range < LLOQ - 0.84 µg/kg)					0.125	Xa (< LLOQ)		–	MACRO (X, frequency 50%, mean 2.1, < LLOQ - 4.4 µg/kg)	UHPLC-MS/MS	ESI (-)	6460 Triple Quadrupole mass spectrometer (Agilent Technologies, Waldbronn, Germany)	[34]
Almonds	25	0.16	X (< 2 - 54.24 µg/kg)	0.2	X (1.75 - 32.11 µg/kg)					0.08	X (2.94 - 7.66 µg/kg)				UHPLC-MS/MS	ESI (-)	Xevo TQ (Waters, USA)	[57]
Chestnuts	33	0.0909091	X (< 2 - 7.08 µg/kg)	0.0909091	X (1.47 - 11.67 µg/kg)					0.0606061	X (2.39 - 6.49 µg/kg)				UHPLC-MS/MS	ESI (-)	Xevo TQ (Waters, USA)	[57]
Groundnut	10		(-, < 0.4 µg/kg)	0.1	X (47 µg/kg)									Macrosporin A (X, frequency 30%, median 20, 0.6 - 60 µg/kg)	HPLC- MS/MS	ESI (-)	QTrap 5500 (Applied Biosystems, Foster City, CA)	[54]
Groundnut - maize	2		(-, < 0.4 µg/kg)		-									Macrosporin A (X, frequency 100%, median 7.1, 5.6 - 8.6 µg/kg)	HPLC- MS/MS	ESI (-)	QTrap 5500 (Applied Biosystems, Foster City, CA)	[54]
Hazelnuts	22	0.909091	X (mean 78; range < LLOQ - 650 µg/kg)	0.863636	X (mean 59; range < LLOQ - 220 µg/kg)					0.772727	X (mean 5.4; range < LLOQ - 21 µg/kg)	0.0909091	Xa (< LLOQ)	MACRO (X, frequency 91%, mean 280, < LLOQ - 2200 µg/kg)	UHPLC-MS/MS	ESI (-)	6460 Triple Quadrupole mass spectrometer (Agilent Technologies, Waldbronn, Germany)	[34]
Hazelnuts	20	0.05	X (64.31 µg/kg)	0.05	X (11.24 µg/kg)					0.05	X (2.43 µg/kg)				UHPLC-MS/MS	ESI (-)	Xevo TQ (Waters, USA)	[57]
Peanuts	15	0.2	Xa (< LLOQ)	0.333333	Xa (< LLOQ)					0.266667	X (mean 4.7; range < LLOQ - 11 µg/kg)		Xa (< LLOQ)	MACRO (X, frequency 20%, mean 9.4, < LLOQ - 26 µg/kg)	UHPLC-MS/MS	ESI (-)	6460 Triple Quadrupole mass spectrometer (Agilent Technologies, Waldbronn, Germany)	[34]
Pine nuts	20	0.1	X (13.40 - 16.84 µg/kg)	0.15	X (0.9 - 7.89 µg/kg)					0.05	X (< 1 µg/kg)				UHPLC-MS/MS	ESI (-)	Xevo TQ (Waters, USA)	[57]
Pistachios	8		–		–						–		–	MACRO (X, frequency 37%, mean 4.6, < LLOQ - 11 µg/kg)	UHPLC-MS/MS	ESI (-)	6460 Triple Quadrupole mass spectrometer (Agilent Technologies, Waldbronn, Germany)	[34]
Walnuts	35	0.228571	X (5.78 - 143 µg/kg)	0.314286	X (1.53 - 110 µg/kg)					0.142857	X (2.77 - 32.87 µg/kg)				UHPLC-MS/MS	ESI (-)	Xevo TQ (Waters, USA)	[57]
Other food and foodstuff
Beer	44	1	X (mean (pos) 0.56, 0.23-1.6 ng/mL)												competititve enzyme immunoassay			[64]
Beer	30	0.3	X (6.04-23.2 ng/g)		–	0.03	X (14.5 ng/g)		–	0.03	X (11.3 ng/g)				HPLC-MS	APCI	MS-310 QqQ (Varian)	[40]
Food supplement (milk thistle-based supplements)	32	0.91	X (mean 941; 16 - 4560 µg/kg)	0.97	X (mean 1070, 6 - 3200 µg/kg)			0.22	X (mean 272, 729 - 2140 µg/kg)	0.78	X (mean 334, 64 - 1280 µg/kg)				UHPLC-MS/MS	ESI (-) and ESI (+)	QTrap 5500 (AB Sciex, Canada)	[42]
Food supplement (supplements for general health improvement)	28	0.29	X (mean 96, 14 - 1460 µg/kg)	0.61	X (mean 103, 5 - 1080 µg/kg)			0.04	X (mean: 252, max. 6780 µg/kg)	0.11	X (mean 9, 34 - 87 µg/kg)				UHPLC-MS/MS	ESI (-) and ESI (+)	QTrap 5500 (AB Sciex, Canada)	[42]
Food supplement (supplements for menopause effect treatments)	9	0.44	X (mean 78, 82 - 223 µg/kg)	0.67	X (mean 82, 5 - 216 µg/kg)			0.11	X (mean 143, max 1210 µg/kg)	0.44	X (mean 51, 38 - 190 µg/kg)				UHPLC-MS/MS	ESI (-) and ESI (+)	QTrap 5500 (AB Sciex, Canada)	[42]
Mulled wine	2	1	X (2.04-2.70 µg/kg)	0.5	X (detected, but < LOQ)										HPLC-MS/MS using stable isotope dilution assays (SIDAs)	ESI (-)	API 4000 QTrap (Applied Biosystems INC, Foster City, CA, USA)	[36]
Red wine	5	1	X (mean 4.50, 0.36-7.50 µg/kg)	1	X (mean 0.08, < LOQ to 0.15 µg/kg)										HPLC-MS/MS using stable isotope dilution assays (SIDAs)	ESI (-)	API 4000 QTrap (Applied Biosystems INC, Foster City, CA, USA)	[36]
Red wines	24	0.833333	X (mean pos: 2.5, 0.03 - 19.4 µg/L)	0.833333	(mean pos: 0.1, 0.01 - 0.23 µg/L)										HPLC-MS/MS & LC-UV	ESI (-)	Quattro Ultima (Micromass)	[39]
Sesame seeds	17	0.88	X (mean 4, 0.3 - 14 µg/kg)	0.65	X (mean 2, 0.2 - 4 µg/kg)			0.941176	X (mean 16, 2 - 40 µg/kg)					macrosporin (X, frequency 94%, mean 8, 1.3 - 32 µg/kg)	HPLC- MS/MS	ESI (-)	QTrap 5500 (Applied Biosystems, Foster City, CA)	[59]
Soya beans	50	0.46	X (mean ca. 72, 25 - 211 µg/kg)	0.44	X (mean ca. 335, 62 - 1153 µg/kg)		-								HPLC-DAD, confirmation: HPLC-MS	ESI (-)	ESQUIRE-LC ion trap spectrometer (Bruker Daltonic, Bremen, Germany)	[48]
Sunflower seed oil	39	0.31	X (mean 1.4, 0.7 - 2.9 µg/kg)	0.62	X (mean 1.7, < 0.06 - 7.1 µg/kg)		-	0.31	X (mean 163, 24 - 458 µg/kg)	0.82	X (mean 1.7, < 0.1 - 21.8 µg/kg)	0.13	X (mean 3.5, 2 - 4.7 µg/kg)	ALP (X, frequency 8%, mean 4.2, 4 - 4.6 µg/kg), AOH-3-S (-), AME-3-S (-)	HPLC-MS/MS	ESI (-)	TSQ Vantage (Thermo Scientific)	[20]
Sunflower seeds	150	0.85	X (mean 189, 50 - 676 µg/kg)	0.46	X (mean 202, 30-836 µg/kg)			0.59	X (mean 6717, 2500 - 15796 µg/kg)						HPLC-DAD and TLC			[60]
Sunflower seeds	11	0.545455	X (mean pos 27, < LOQ - 39 µg/kg)	0.636364	X (mean pos 11, < LOQ - 21 µg/kg)	0.0909091	X (< LOQ)		X		X		Xa	IsoALT (Xa frequency 9%, < LOQ), AAL TA1 (–), AAL TA2(–)	HPLC-MS/MS	ESI (-)	QTrap 5500 (AB Sciex, Darmstadt, Germany)	[46]
Sunflower seeds (shelled)	80	0.05	X (mean 63.2, 7.7 - 119 µg/kg)	0.06	X (mean 8.1, 0.7 - 27.8 µg/kg)			0.35	X (mean 752, 65.7 - 6260 µg/kg)	0.6	X (mean 6.7, 1.7 - 43.3 µg/kg)			ALTSOH (X, frequency 5%, mean 1.2, 1.2 - 1.3 µg/kg), Val-TeA (X, frequency 5%, mean 251, 130 - 373 µg/kg)	HPLC-MS/MS	ESI (-)	QTrap 400 (API, Sciex, Darmstadt, Germany)	[61]
Sunflower seeds (unshelled)	79	0.11	X (mean 62.4, 4.6 - 246 µg/kg)	0.17	X (mean 24.1, 0.9 - 197 µg/kg)			0.67	X (mean 510, 82.7 - 5160 µg/kg)	0.86	X (mean 19.7, 1.3 - 130 µg/kg)			ALTSOH (X, frequency 6%, mean 2.3, 1.6 - 4.2 µg/kg), Val-TeA (X, frequency 18%, mean 135, 71.3 - 251 µg/kg)	HPLC-MS/MS	ESI (-)	QTrap 400 (API, Sciex, Darmstadt, Germany)	[61]
Sunfower seeds	5		(-, < 2.0 µg/kg)		(-, < 1.0 µg/kg)		(-, < 1.5 µg/kg)	1	(X, mean 233, 85 - 449 µg/kg)		(-, < 2.5 µg/kg)				UHPLC-MS/MS	ESI (-)	QTrap 5500, (AB Sciex)	[41]
White wine	6	1	X (mean 1.13, 0.10-7.59 µg/kg)	0.166667	X (detected, but < LOQ)										HPLC-MS/MS using stable isotope dilution assays (SIDAs)	ESI (-)	API 4000 QTrap (Applied Biosystems INC, Foster City, CA, USA)	[36]
White wines	23	0.0869565	X (mean pos: 1.05, 0.67 - 1.5 µg/L)	0.0869565	(mean pos: 0.04, 0.02 - 0.06 µg/L)										HPLC-MS/MS & LC-UV	ESI (-)	Quattro Ultima (Micromass)	[39]
Wine	5	0.2	(X, < 2.0 - 11 µg/kg)		(-, < 1.0 µg/kg)		(-, < 1.5 µg/kg)	0.6	(X, mean 25, < 5.0 - 46 µg/kg)		(-, < 2.5 µg/kg)				UHPLC-MS/MS	ESI (-)	QTrap 5500, (AB Sciex)	[41]
